# Supplementary material for: Mapping of Micro-Tom BAC-End Sequences to the Reference Tomato Genome Reveals Possible Genome Rearrangements and Polymorphisms
Source: Int J Plant Genomics. 2012 Nov 27;2012:437026. doi: 10.1155/2012/437026 (PMC3514829; doi:10.1155/2012/437026)
Supplement: Supplementary file 2 [file 437026.f2.xlsx]

## Sheet: Sheet1
Supplemental Table 2. Types of polymorphisms
	SL2.40ch00	SL2.40ch01	SL2.40ch02	SL2.40ch03	SL2.40ch04	SL2.40ch05	SL2.40ch06	SL2.40ch07	SL2.40ch08	SL2.40ch09	SL2.40ch10	SL2.40ch11	SL2.40ch12
transition	1035	5117	5867	4738	4126	13788	2213	3685	3130	3733	2936	6554	3709
transversion	1248	8063	6794	6751	6152	14807	3736	5694	5214	5910	5231	7711	5951
IN+1bp	138	1171	743	895	957	1112	562	905	846	907	805	767	932
IN+2bp	11	31	32	40	41	85	8	30	17	21	7	59	20
IN+3bp	0	5	11	16	6	30	3	6	6	3	1	16	3
IN+4bp	0	7	11	8	5	25	2	8	9	3	2	17	9
IN+5bp	1	2	5	5	7	5	0	3	0	0	1	7	1
IN+6bp	0	6	4	8	5	11	0	4	1	1	0	8	3
IN+7bp	0	3	2	2	0	9	0	1	0	2	1	3	1
IN+8bp	0	7	2	1	4	4	0	2	1	3	0	5	1
IN+9bp	0	0	0	3	1	8	0	2	0	0	1	1	0
IN+10bp	3	8	15	14	19	9	9	7	12	9	12	17	16
IN+11bp	1	22	14	16	23	17	12	18	13	13	12	15	19
IN+12bp	0	2	1	3	1	7	0	2	0	2	0	3	2
IN+13bp	0	0	2	4	2	1	0	0	0	0	0	4	0
IN+14bp	0	3	2	3	4	2	1	2	0	0	0	2	0
IN+15bp	0	0	3	2	3	2	0	1	0	0	0	1	0
IN+16bp	1	0	1	0	1	4	1	2	0	1	0	0	1
IN+17bp	0	2	0	1	2	0	0	0	0	1	0	2	0
IN+18bp	0	0	2	0	4	5	1	1	0	0	0	0	1
IN+19bp	0	0	1	4	0	5	0	0	2	1	0	0	1
IN+20bp	1	0	0	0	0	1	0	1	0	0	0	1	0
IN+21bp	0	1	1	2	1	5	0	0	0	0	0	0	1
IN+22bp	0	1	0	1	2	3	0	0	0	1	0	3	2
IN+23bp	0	0	0	0	0	0	0	0	0	0	0	0	0
IN+24bp	0	0	0	0	1	1	0	0	0	0	0	0	0
IN+25bp	0	0	0	0	0	0	0	0	0	0	0	0	0
IN+26bp	0	1	0	0	0	0	0	0	0	0	0	0	0
DEL-1bp	180	1861	1170	1449	1370	1701	951	1360	1361	1496	1442	1252	1471
DEL-2bp	10	100	72	73	72	118	34	52	41	44	45	89	45
DEL-3bp	2	25	17	22	13	32	4	21	6	2	7	31	15
DEL-4bp	1	9	13	7	9	23	5	9	9	3	1	9	9
DEL-5bp	0	3	5	3	2	12	0	5	0	2	4	7	5
DEL-6bp	1	2	5	11	3	10	1	3	1	0	0	10	7
DEL-7bp	2	4	0	1	4	8	0	4	1	0	0	2	1
DEL-8bp	0	4	3	10	3	5	1	4	2	2	2	8	1
DEL-9bp	0	1	2	3	3	8	0	3	1	1	0	0	2
DEL-10bp	0	1	2	5	1	11	1	1	0	0	0	2	1
DEL-11bp	0	1	0	2	1	2	1	2	0	1	0	1	0
DEL-12bp	0	1	4	0	2	10	2	2	0	0	1	9	1
DEL-13bp	0	1	2	0	1	3	1	2	0	1	0	5	0
DEL-14bp	0	1	2	0	4	3	1	1	1	0	0	1	0
DEL-15bp	0	0	1	0	0	6	0	3	1	0	0	1	1
DEL-16bp	0	1	1	1	0	3	0	0	0	0	0	2	1
DEL-17bp	0	2	1	0	0	1	0	0	0	0	0	0	0
DEL-18bp	0	0	1	1	0	5	0	1	0	0	0	0	1
DEL-19bp	0	0	0	1	1	5	0	1	0	0	0	2	0
DEL-20bp	0	1	1	0	0	3	1	2	0	0	0	2	0
DEL-21bp	0	0	0	0	0	3	0	1	0	0	0	1	0
DEL-22bp	0	1	2	1	2	2	0	0	0	0	0	1	2
DEL-23bp	0	0	0	0	0	0	0	0	0	0	0	0	0
DEL-24bp	0	0	0	1	0	0	0	0	0	0	0	0	0
DEL-25bp	0	0	0	0	0	0	0	0	0	0	0	0	0
DEL-26bp	0	0	0	0	0	0	0	0	0	0	0	0	0
IN and DEL: Insertion and deletion in SL2.40 sequences, respectively
